# Supplementary material for: A homogeneous earthquake catalogue for Turkey
Source: Copernicus journal article supplement (doi:10.5194/nhess-21-2059-2021), 2021-07-08
Supplement: Supplementary file 1 [file nhess-21-2059-2021-supplement.zip]

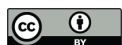

## *Supplement of*

# **A homogeneous earthquake catalogue for Turkey**

**Onur Tan**

*Correspondence to:* Onur Tan (onur.tan@iuc.edu.tr)

- nhess-21-2059-2021-supplement-title-page.pdf
- TURHEC-catalogue.dat

The copyright of individual parts of the supplement might differ from the article licence.
